# Supplementary material for: Selection of reliable reference genes for gene expression studies in peach using real-time PCR
Source: PubMed Central journal article supplement (PMC3224724; doi:10.1186/1471-2199-10-71), 2009-07-20
Supplement: 1471-2199-10-71-S1.pdf [file 1471-2199-10-71-S1.pdf]

| Gene name       | All samples  |             |             | Fruit developmental series | Different genotypes | Different storage time series | Different regulator treatments | Different tissues |
|-----------------|--------------|-------------|-------------|----------------------------|---------------------|-------------------------------|--------------------------------|-------------------|
|                 | No subgroups | 2 subgroups | 5 subgroups |                            |                     |                               |                                |                   |
| <i>18S rRNA</i> | 0.140        | 0.098       | 0.056       | 0.101                      | 0.051               | 0.087                         | 0.162                          | 0.140             |
| <i>ACT</i>      | 0.048        | 0.057       | 0.020       | 0.023                      | 0.023               | 0.023                         | 0.025                          | 0.060             |
| <i>CYP2</i>     | 0.045        | 0.028       | 0.015       | 0.028                      | 0.030               | 0.028                         | 0.058                          | 0.015             |
| <i>GAPDH</i>    | 0.047        | 0.064       | 0.018       | 0.036                      | 0.021               | 0.023                         | 0.007                          | 0.068             |
| <i>PLA2</i>     | 0.055        | 0.061       | 0.021       | 0.054                      | 0.053               | 0.056                         | 0.035                          | 0.056             |
| <i>RP II</i>    | 0.037        | 0.017       | 0.010       | 0.005                      | 0.002               | 0.003                         | 0.024                          | 0.033             |
| <i>TEF2</i>     | 0.019        | 0.027       | 0.007       | 0.020                      | 0.005               | 0.020                         | 0.006                          | 0.010             |
| <i>TUA</i>      | 0.042        | 0.044       | 0.015       | 0.024                      | 0.026               | 0.009                         | 0.060                          | 0.034             |
| <i>TUB</i>      | 0.043        | 0.047       | 0.012       | 0.008                      | 0.002               | 0.014                         | 0.052                          | 0.050             |
| <i>UBQ10</i>    | 0.027        | 0.039       | 0.013       | 0.026                      | 0.033               | 0.031                         | 0.007                          | 0.031             |
