# Supplementary material for: Selection of reliable reference genes for gene expression studies in peach using real-time PCR
Source: PubMed Central journal article supplement (PMC3224724; doi:10.1186/1471-2199-10-71), 2009-07-20
Supplement: 1471-2199-10-71-S2.pdf [file 1471-2199-10-71-S2.pdf]

## All samples

|              | <i>18S rRNA</i> | <i>ACT</i> | <i>CYP2</i> | <i>TEF2</i> | <i>GAPDH</i> | <i>PLA2</i> | <i>RP II</i> | <i>TUA</i> | <i>TUB</i> | <i>UBQ10</i> |
|--------------|-----------------|------------|-------------|-------------|--------------|-------------|--------------|------------|------------|--------------|
| <i>ACT</i>   | 0.645           | -          | -           | -           | -            | -           | -            | -          | -          | -            |
| <i>CYP2</i>  | 0.855           | 0.778      | -           | -           | -            | -           | -            | -          | -          | -            |
| <i>TEF2</i>  | 0.788           | 0.934      | 0.870       | -           | -            | -           | -            | -          | -          | -            |
| <i>GAPDH</i> | 0.609           | 0.925      | 0.841       | 0.945       | -            | -           | -            | -          | -          | -            |
| <i>PLA2</i>  | 0.921           | 0.643      | 0.924       | 0.815       | 0.722        | -           | -            | -          | -          | -            |
| <i>RP II</i> | 0.685           | 0.899      | 0.891       | 0.928       | 0.931        | 0.789       | -            | -          | -          | -            |
| <i>TUA</i>   | 0.789           | 0.789      | 0.893       | 0.908       | 0.849        | 0.859       | 0.939        | -          | -          | -            |
| <i>TUB</i>   | 0.593           | 0.970      | 0.761       | 0.955       | 0.964        | 0.657       | 0.926        | 0.830      | -          | -            |
| <i>UBQ10</i> | 0.732           | 0.939      | 0.836       | 0.992       | 0.959        | 0.784       | 0.933        | 0.899      | 0.972      | -            |
| BestKeeper   | 0.851           | 0.906      | 0.939       | 0.981       | 0.926        | 0.893       | 0.950        | 0.943      | 0.912      | 0.967        |

## Fruit developmental series

|              | <i>18S rRNA</i> | <i>ACT</i> | <i>CYP2</i> | <i>TEF2</i> | <i>GAPDH</i> | <i>PLA2</i> | <i>RP II</i> | <i>TUA</i> | <i>TUB</i> | <i>UBQ10</i> |
|--------------|-----------------|------------|-------------|-------------|--------------|-------------|--------------|------------|------------|--------------|
| <i>ACT</i>   | 0.982           | -          | -           | -           | -            | -           | -            | -          | -          | -            |
| <i>CYP2</i>  | 0.933           | 0.964      | -           | -           | -            | -           | -            | -          | -          | -            |
| <i>TEF2</i>  | 0.960           | 0.990      | 0.988       | -           | -            | -           | -            | -          | -          | -            |
| <i>GAPDH</i> | 0.844           | 0.903      | 0.980       | 0.951       | -            | -           | -            | -          | -          | -            |
| <i>PLA2</i>  | 0.915           | 0.896      | 0.939       | 0.927       | 0.894        | -           | -            | -          | -          | -            |
| <i>RP II</i> | 0.926           | 0.962      | 0.993       | 0.991       | 0.977        | 0.946       | -            | -          | -          | -            |
| <i>TUA</i>   | 0.916           | 0.937      | 0.993       | 0.972       | 0.977        | 0.965       | 0.989        | -          | -          | -            |
| <i>TUB</i>   | 0.947           | 0.979      | 0.985       | 0.997       | 0.955        | 0.938       | 0.996        | 0.975      | -          | -            |
| <i>UBQ10</i> | 0.942           | 0.980      | 0.992       | 0.998       | 0.968        | 0.924       | 0.996        | 0.978      | 0.997      | -            |
| BestKeeper   | 0.959           | 0.981      | 0.993       | 0.997       | 0.959        | 0.949       | 0.995        | 0.986      | 0.995      | 0.996        |

## Different genotypes

|              | <i>18S rRNA</i> | <i>ACT</i> | <i>CYP2</i> | <i>TEF2</i> | <i>GAPDH</i> | <i>PLA2</i> | <i>RP II</i> | <i>TUA</i> | <i>TUB</i> | <i>UBQ10</i> |
|--------------|-----------------|------------|-------------|-------------|--------------|-------------|--------------|------------|------------|--------------|
| <i>ACT</i>   | 0.988           | -          | -           | -           | -            | -           | -            | -          | -          | -            |
| <i>CYP2</i>  | 0.965           | 0.979      | -           | -           | -            | -           | -            | -          | -          | -            |
| <i>TEF2</i>  | 0.965           | 0.975      | 1.000       | -           | -            | -           | -            | -          | -          | -            |
| <i>GAPDH</i> | 0.957           | 0.981      | 0.997       | 0.995       | -            | -           | -            | -          | -          | -            |
| <i>PLA2</i>  | 0.964           | 0.914      | 0.906       | 0.913       | 0.879        | -           | -            | -          | -          | -            |
| <i>RP II</i> | 0.976           | 0.979      | 0.997       | 0.998       | 0.990        | 0.934       | -            | -          | -          | -            |
| <i>TUA</i>   | 0.993           | 0.988      | 0.989       | 0.989       | 0.981        | 0.953       | 0.996        | -          | -          | -            |
| <i>TUB</i>   | 0.981           | 0.982      | 0.996       | 0.997       | 0.989        | 0.940       | 1.000        | 0.998      | -          | -            |
| <i>UBQ10</i> | 0.981           | 0.993      | 0.996       | 0.994       | 0.995        | 0.917       | 0.995        | 0.995      | 0.996      | -            |
| BestKeeper   | 0.987           | 0.990      | 0.991       | 0.999       | 0.989        | 0.939       | 0.997        | 0.994      | 0.998      | 0.995        |

### Different storage time series

|              | <i>18S rRNA</i> | <i>ACT</i> | <i>CYP2</i> | <i>TEF2</i> | <i>GAPDH</i> | <i>PLA2</i> | <i>RP II</i> | <i>TUA</i> | <i>TUB</i> | <i>UBQ10</i> |
|--------------|-----------------|------------|-------------|-------------|--------------|-------------|--------------|------------|------------|--------------|
| <i>ACT</i>   | 0.979           | -          | -           | -           | -            | -           | -            | -          | -          | -            |
| <i>CYP2</i>  | 0.982           | 1.000      | -           | -           | -            | -           | -            | -          | -          | -            |
| <i>TEF2</i>  | 0.972           | 0.998      | 0.997       | -           | -            | -           | -            | -          | -          | -            |
| <i>GAPDH</i> | 0.952           | 0.994      | 0.993       | 0.996       | -            | -           | -            | -          | -          | -            |
| <i>PLA2</i>  | 0.972           | 0.934      | 0.937       | 0.937       | 0.901        | -           | -            | -          | -          | -            |
| <i>RP II</i> | 0.968           | 0.994      | 0.993       | 0.999       | 0.992        | 0.945       | -            | -          | -          | -            |
| <i>TUA</i>   | 0.991           | 0.995      | 0.996       | 0.994       | 0.981        | 0.966       | 0.993        | -          | -          | -            |
| <i>TUB</i>   | 0.964           | 0.991      | 0.990       | 0.998       | 0.991        | 0.944       | 1.000        | 0.991      | -          | -            |
| <i>UBQ10</i> | 0.964           | 0.997      | 0.996       | 1.000       | 0.998        | 0.927       | 0.998        | 0.990      | 0.997      | -            |
| BestKeeper   | 0.984           | 0.995      | 0.993       | 0.998       | 0.989        | 0.954       | 0.997        | 0.999      | 0.990      | 0.992        |

### Different regulator treatments

|              | <i>18S rRNA</i> | <i>ACT</i> | <i>CYP2</i> | <i>TEF2</i> | <i>GAPDH</i> | <i>PLA2</i> | <i>RP II</i> | <i>TUA</i> | <i>TUB</i> | <i>UBQ10</i> |
|--------------|-----------------|------------|-------------|-------------|--------------|-------------|--------------|------------|------------|--------------|
| <i>ACT</i>   | 0.986           | -          | -           | -           | -            | -           | -            | -          | -          | -            |
| <i>CYP2</i>  | 0.973           | 0.998      | -           | -           | -            | -           | -            | -          | -          | -            |
| <i>TEF2</i>  | 0.982           | 1.000      | 0.999       | -           | -            | -           | -            | -          | -          | -            |
| <i>GAPDH</i> | 0.968           | 0.996      | 0.999       | 0.998       | -            | -           | -            | -          | -          | -            |
| <i>PLA2</i>  | 0.991           | 0.961      | 0.942       | 0.955       | 0.932        | -           | -            | -          | -          | -            |
| <i>RP II</i> | 0.977           | 0.999      | 1.000       | 1.000       | 0.999        | 0.947       | -            | -          | -          | -            |
| <i>TUA</i>   | 0.915           | 0.962      | 0.977       | 0.968       | 0.976        | 0.883       | 0.974        | -          | -          | -            |
| <i>TUB</i>   | 0.985           | 0.999      | 0.998       | 0.999       | 0.995        | 0.963       | 0.998        | 0.970      | -          | -            |
| <i>UBQ10</i> | 0.989           | 1.000      | 0.996       | 0.999       | 0.994        | 0.963       | 0.997        | 0.954      | 0.997      | -            |
| BestKeeper   | 0.991           | 0.996      | 0.995       | 0.998       | 0.992        | 0.970       | 0.999        | 0.959      | 0.998      | 0.997        |

### Different tissues

|              | <i>18S rRNA</i> | <i>ACT</i> | <i>CYP2</i> | <i>TEF2</i> | <i>GAPDH</i> | <i>PLA2</i> | <i>RP II</i> | <i>TUA</i> | <i>TUB</i> | <i>UBQ10</i> |
|--------------|-----------------|------------|-------------|-------------|--------------|-------------|--------------|------------|------------|--------------|
| <i>ACT</i>   | 0.404           | -          | -           | -           | -            | -           | -            | -          | -          | -            |
| <i>CYP2</i>  | 0.449           | 0.863      | -           | -           | -            | -           | -            | -          | -          | -            |
| <i>TEF2</i>  | 0.424           | 0.880      | 0.999       | -           | -            | -           | -            | -          | -          | -            |
| <i>GAPDH</i> | 0.089           | 0.967      | 0.928       | 0.937       | -            | -           | -            | -          | -          | -            |
| <i>PLA2</i>  | 0.789           | 0.575      | 0.903       | 0.891       | 0.680        | -           | -            | -          | -          | -            |
| <i>RP II</i> | 0.433           | 0.857      | 0.998       | 0.996       | 0.936        | 0.893       | -            | -          | -          | -            |
| <i>TUA</i>   | 0.715           | 0.575      | 0.905       | 0.889       | 0.728        | 0.963       | 0.914        | -          | -          | -            |
| <i>TUB</i>   | 0.156           | 0.974      | 0.951       | 0.961       | 0.992        | 0.729       | 0.951        | 0.744      | -          | -            |
| <i>UBQ10</i> | 0.405           | 0.887      | 0.999       | 1.000       | 0.945        | 0.881       | 0.997        | 0.885      | 0.966      | -            |
| BestKeeper   | 0.504           | 0.827      | 0.998       | 0.995       | 0.904        | 0.928       | 0.996        | 0.930      | 0.929      | 0.993        |
